# Supplementary material
Source: PubMed Central journal article supplement (PMC3792168)

Tumor 2

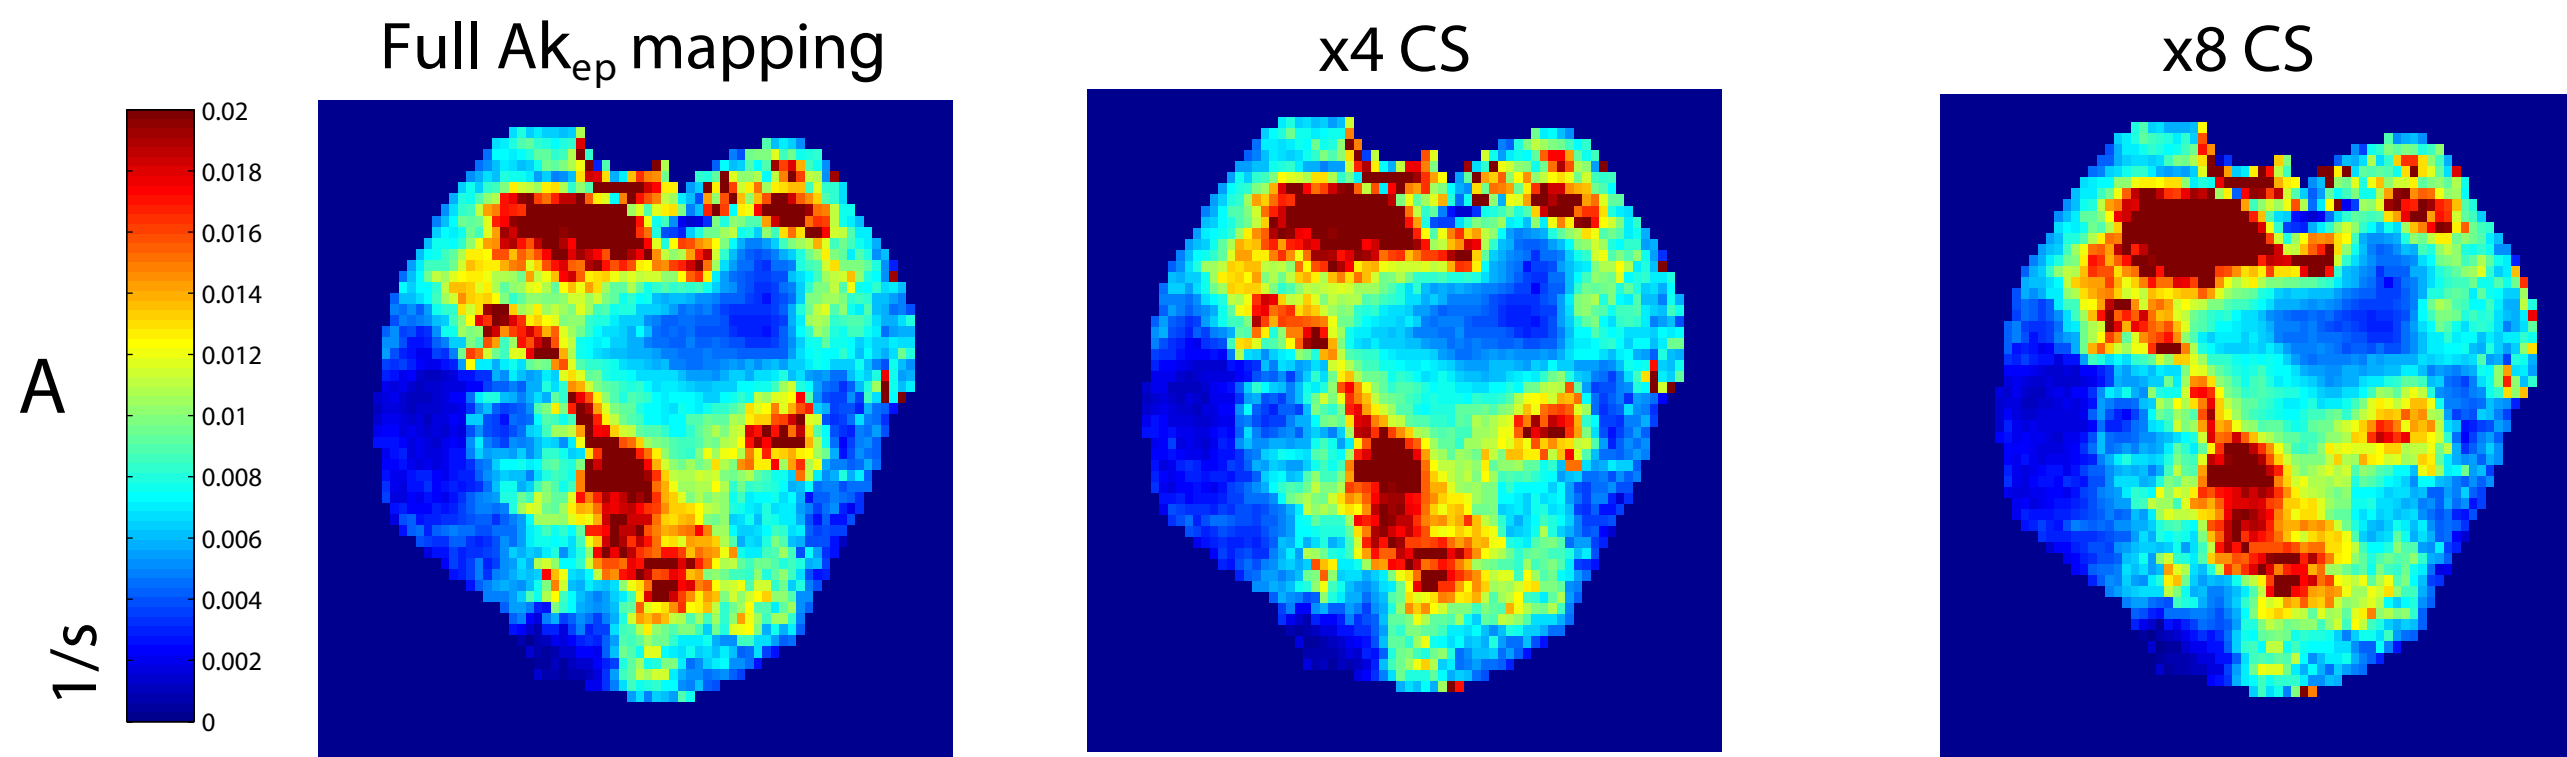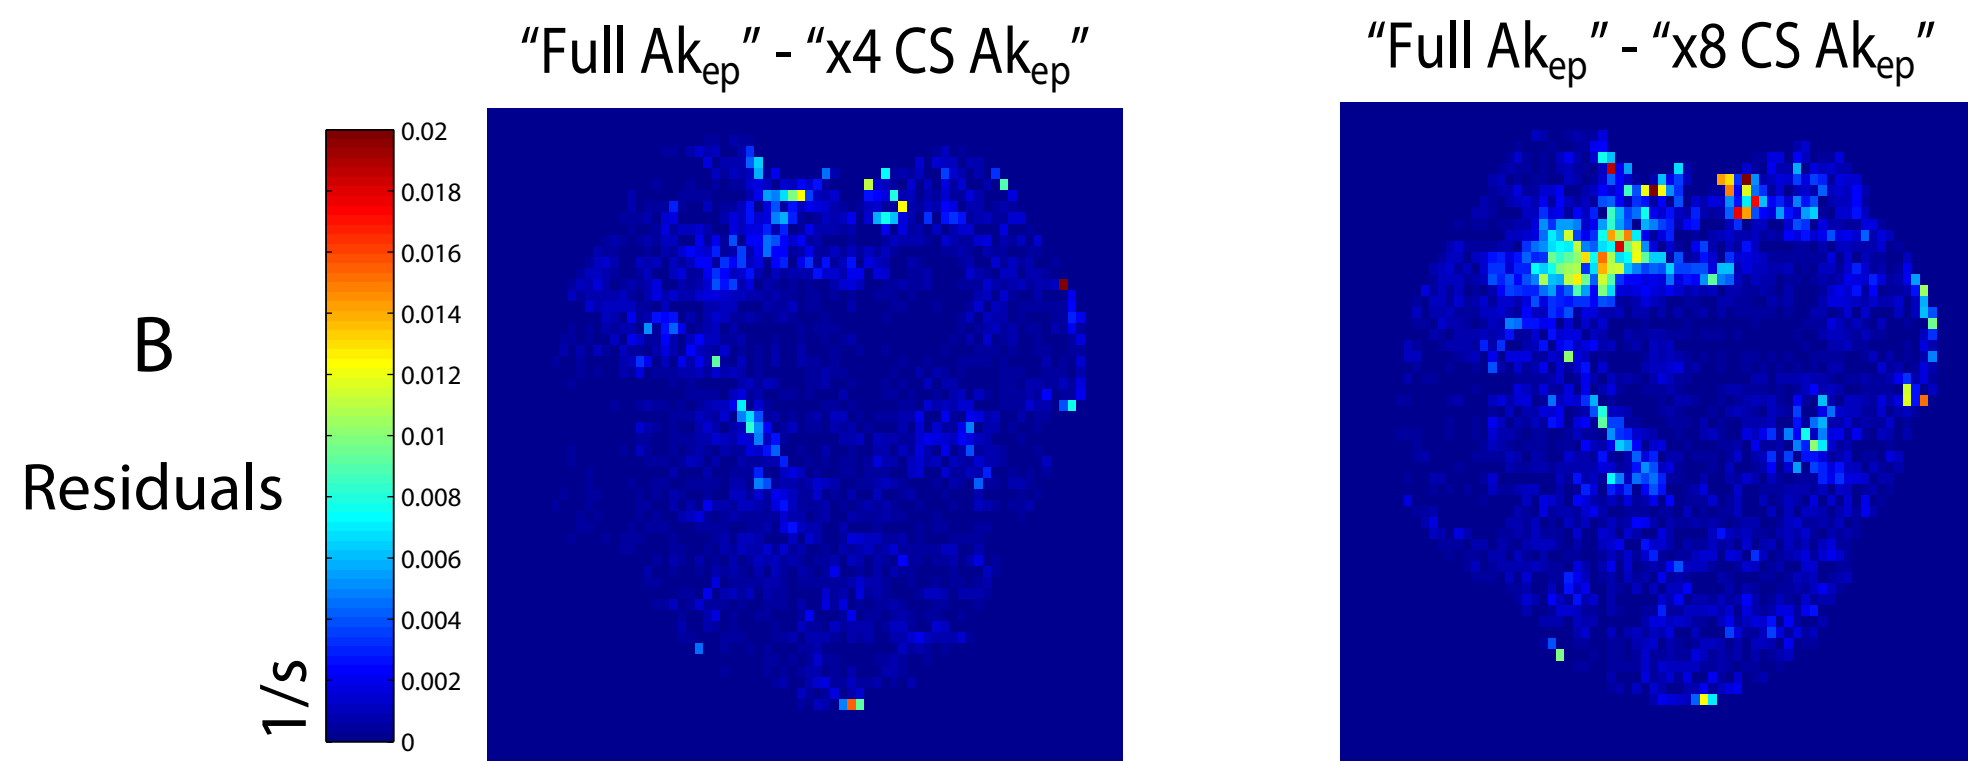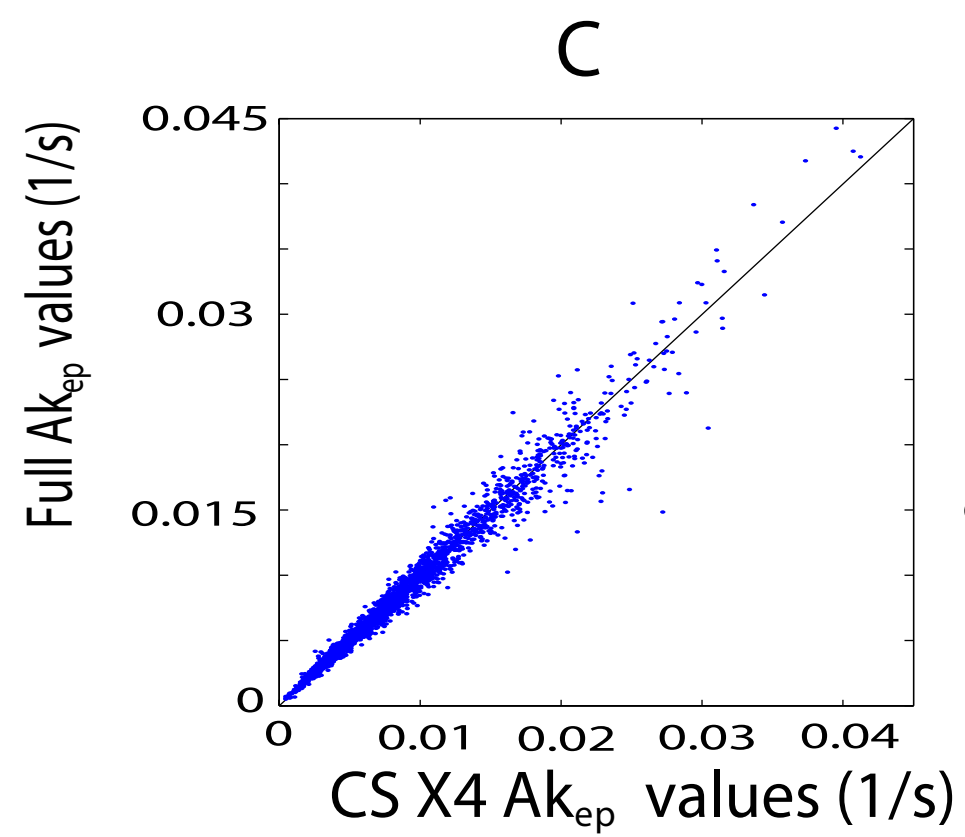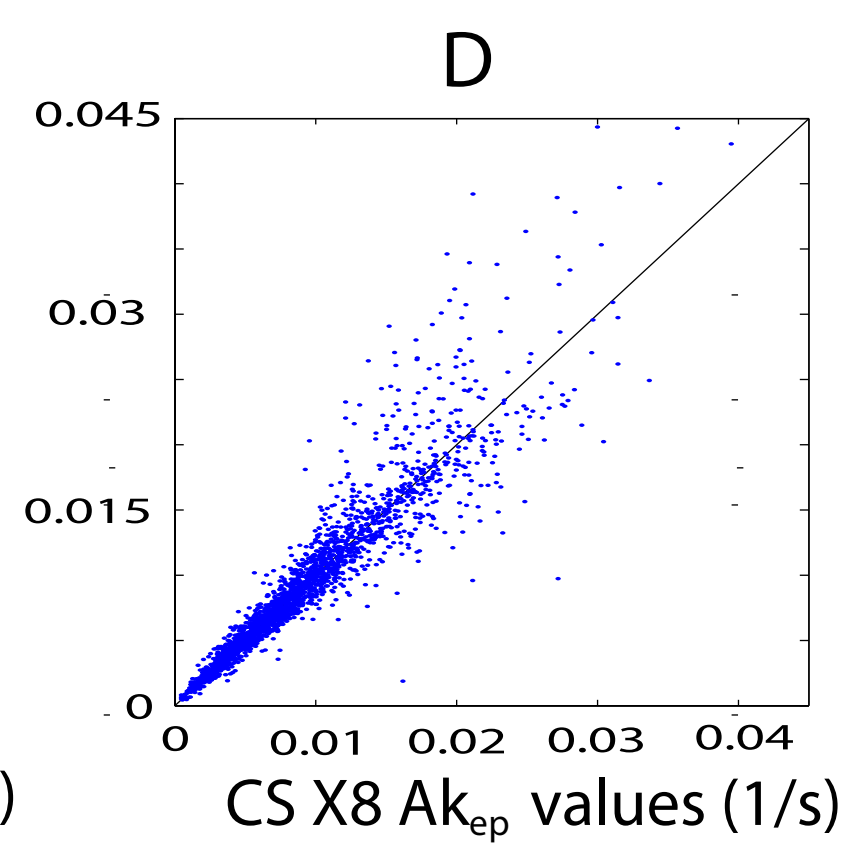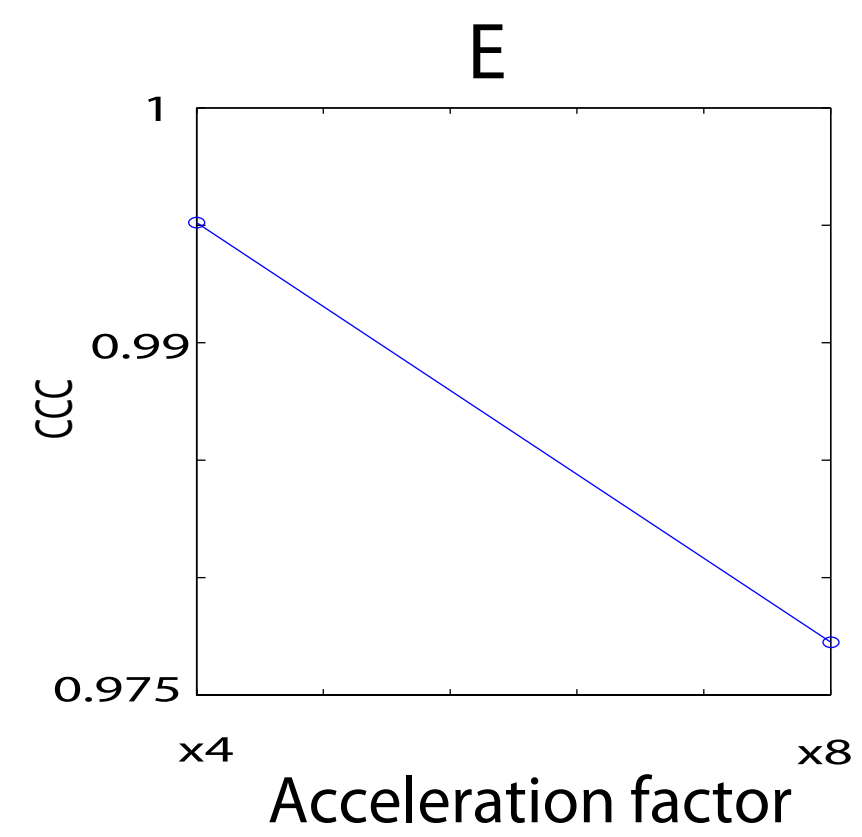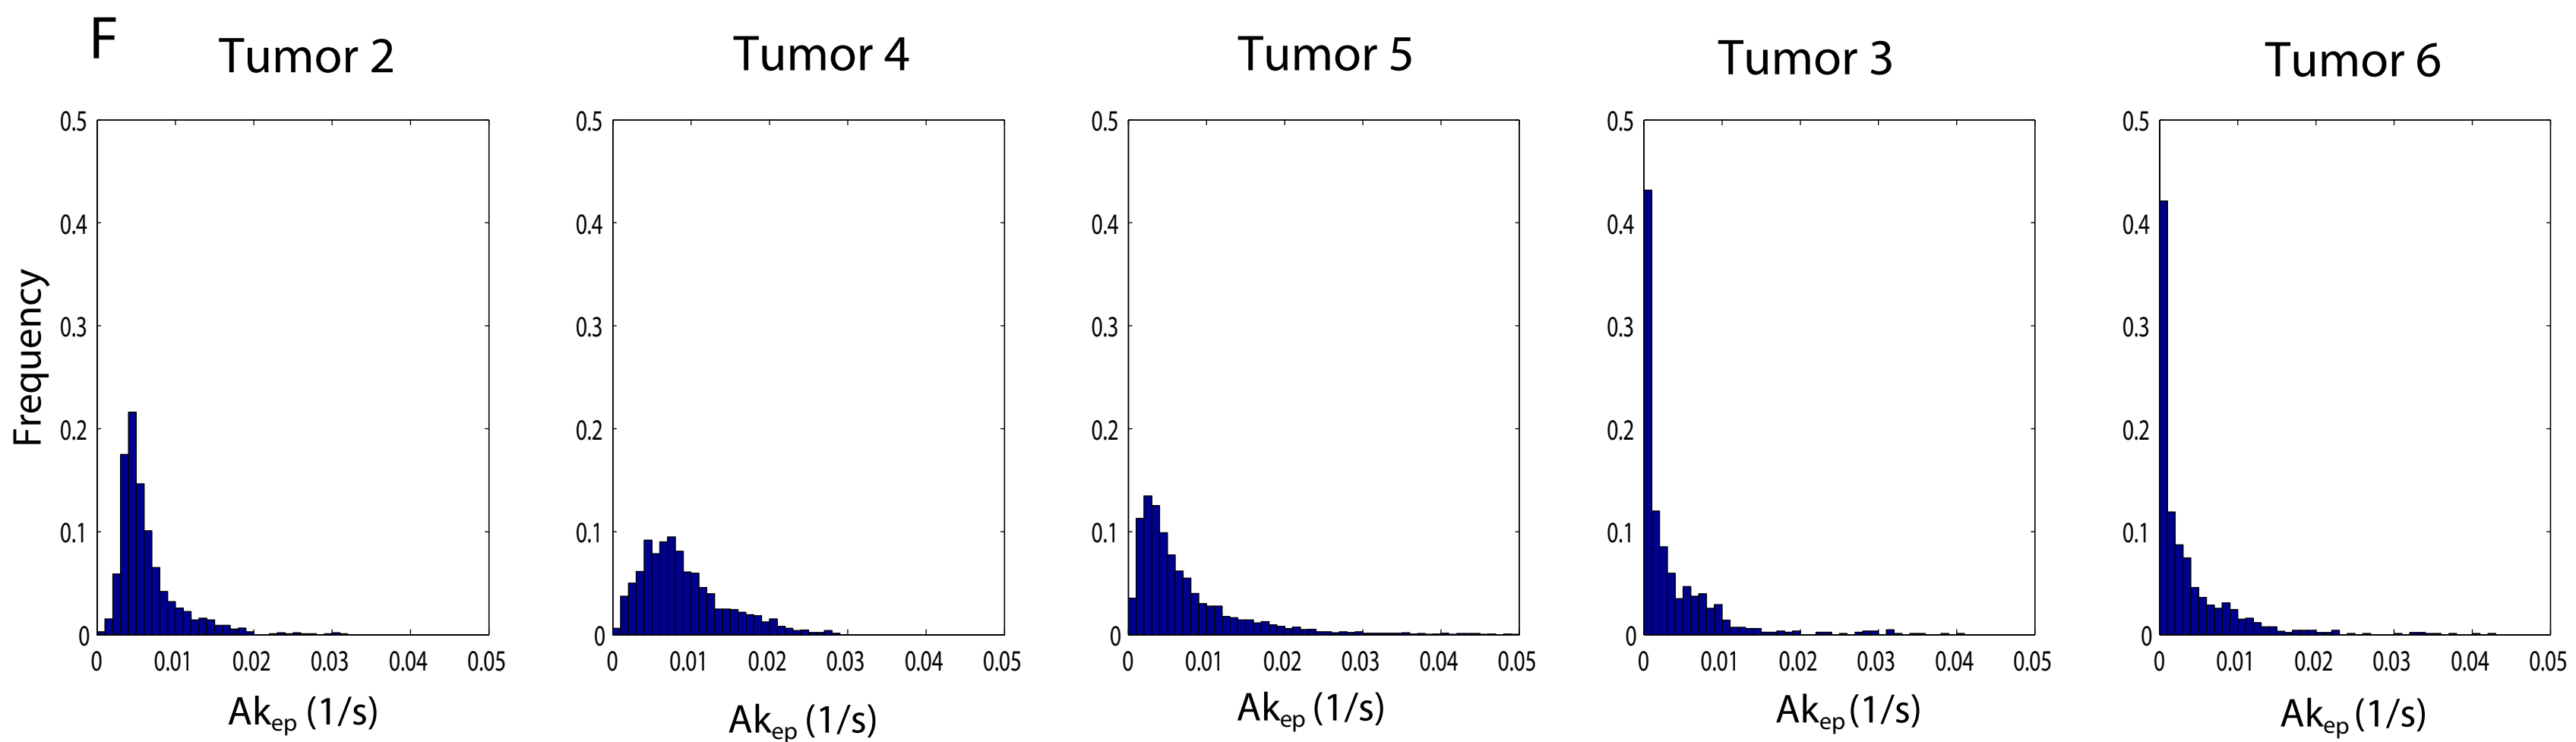

Decreasing CCC value

Supplement: NIHMS502511-supplement-1.pdf [file NIHMS502511-supplement-1.pdf]

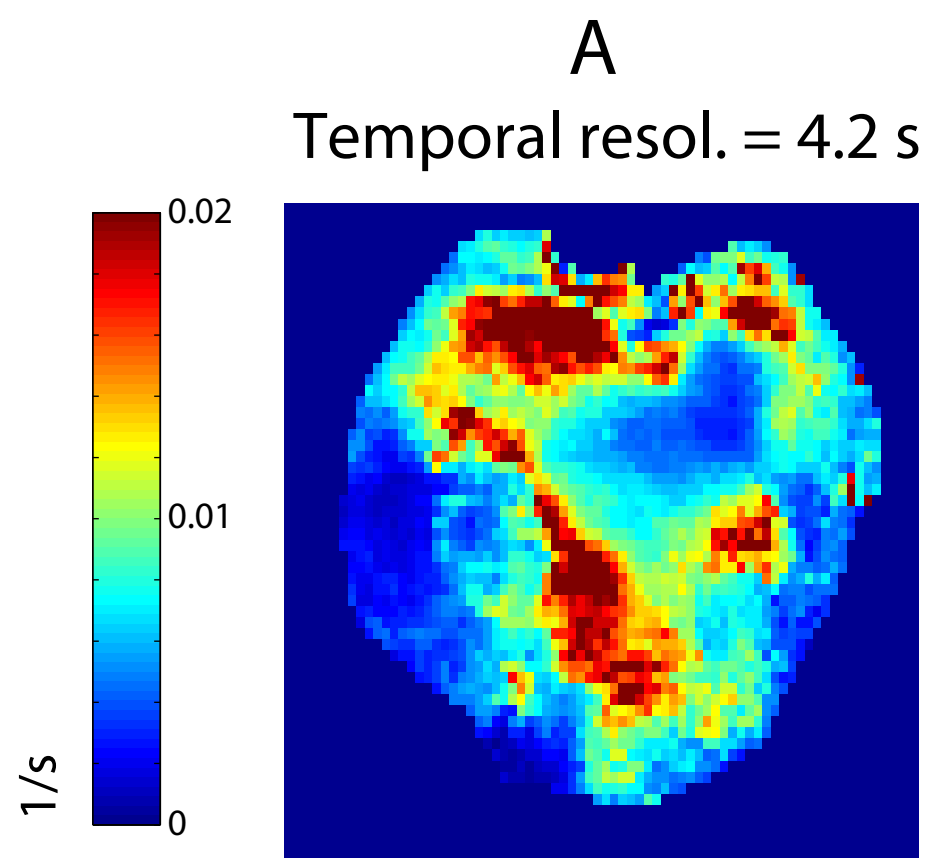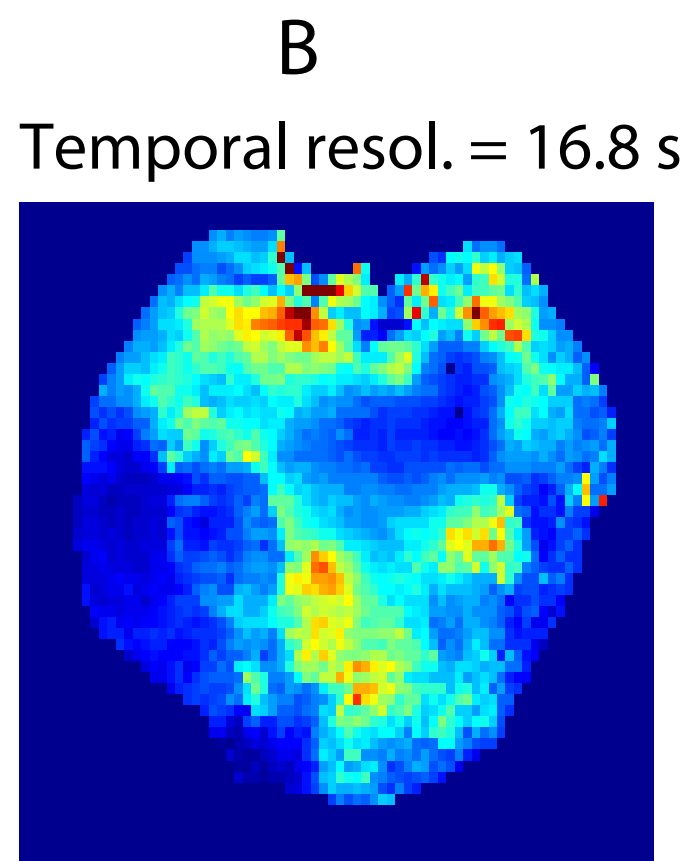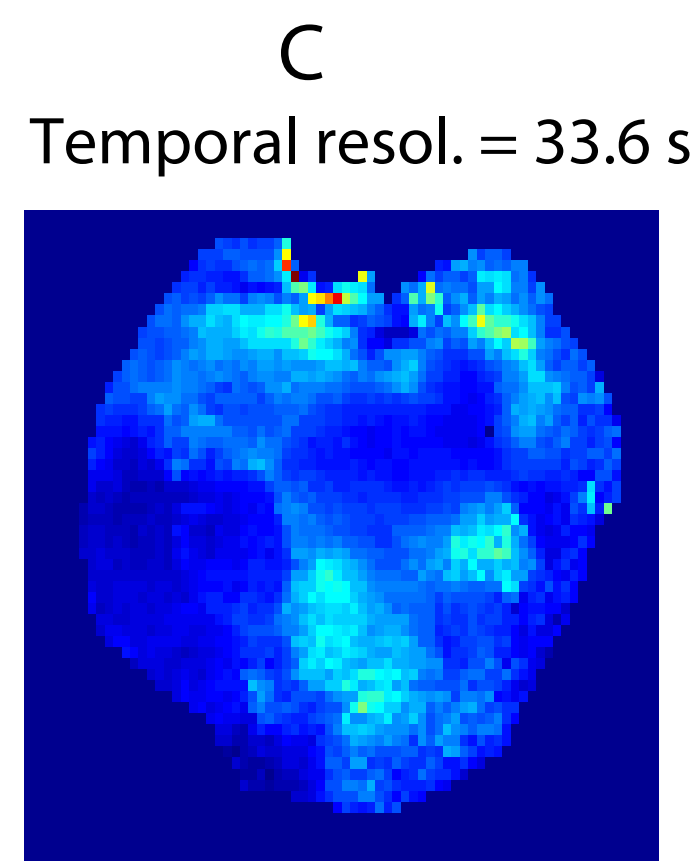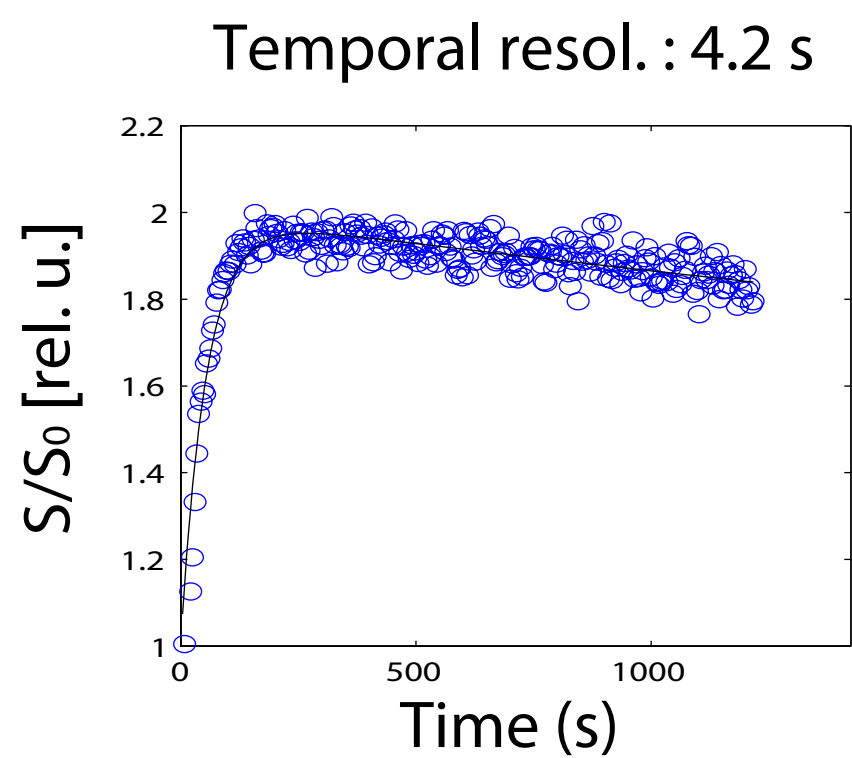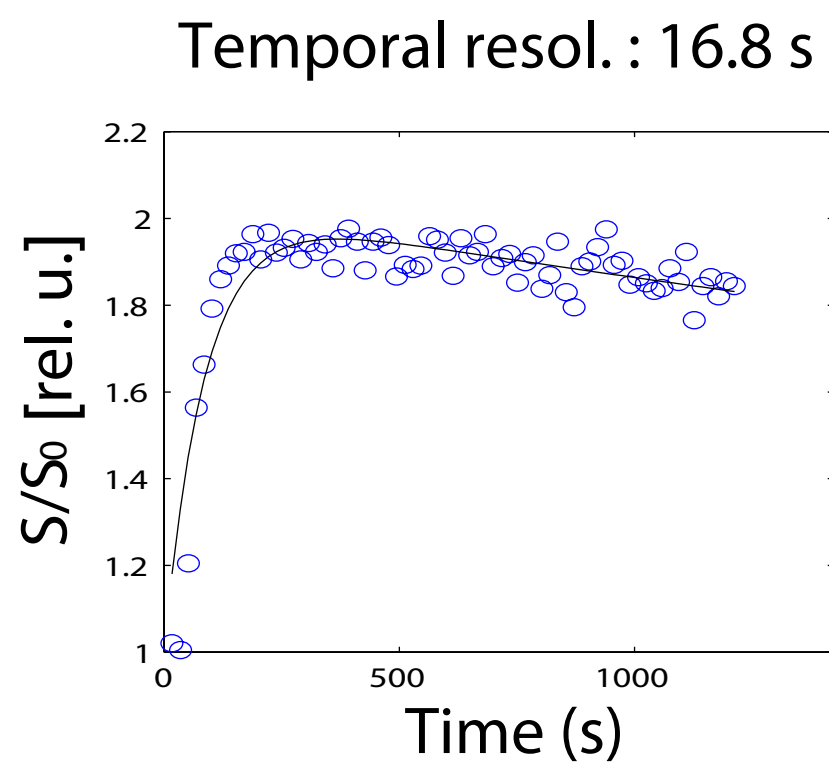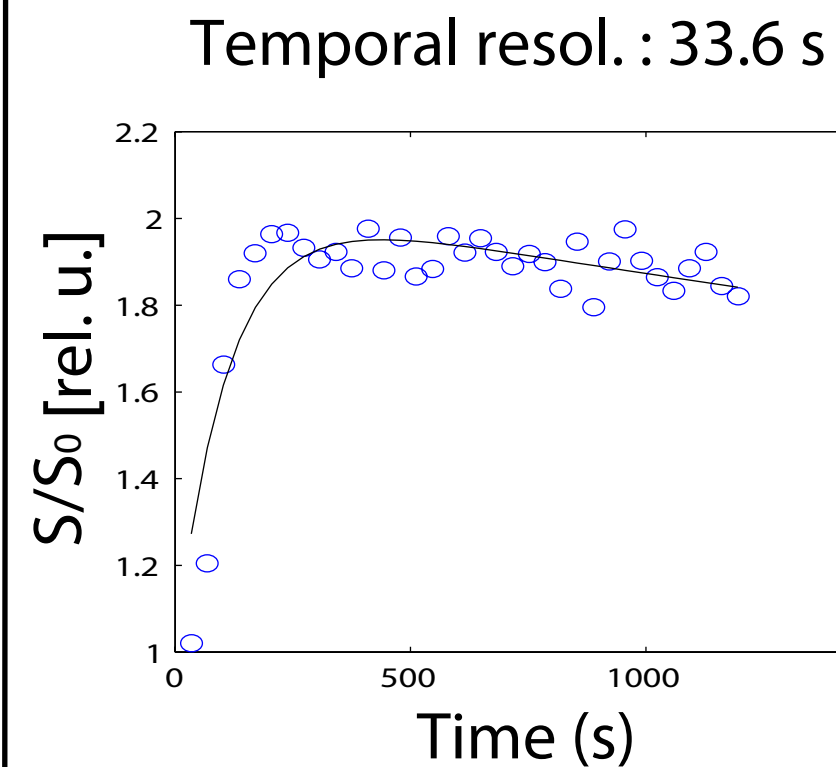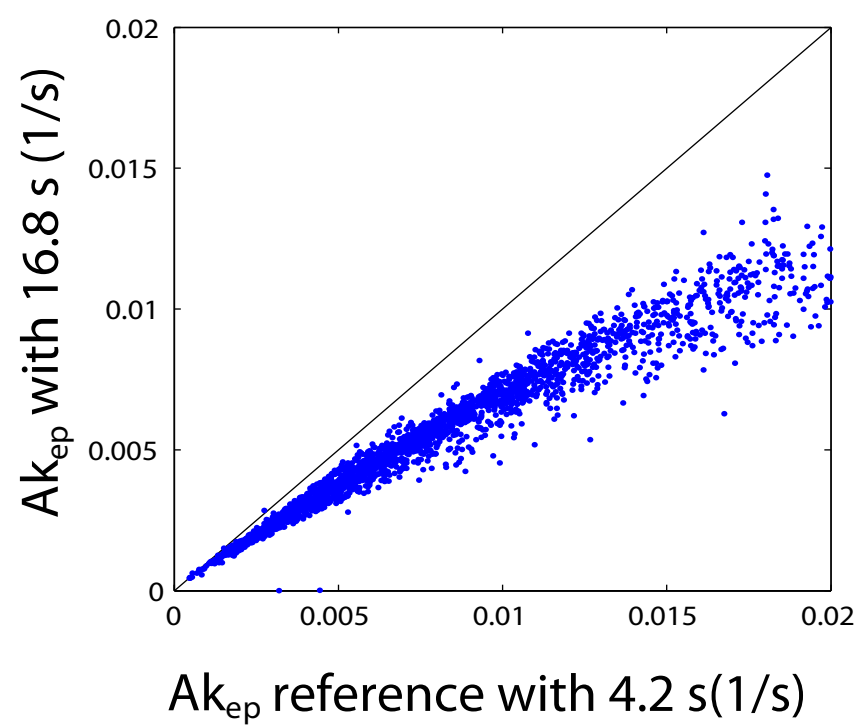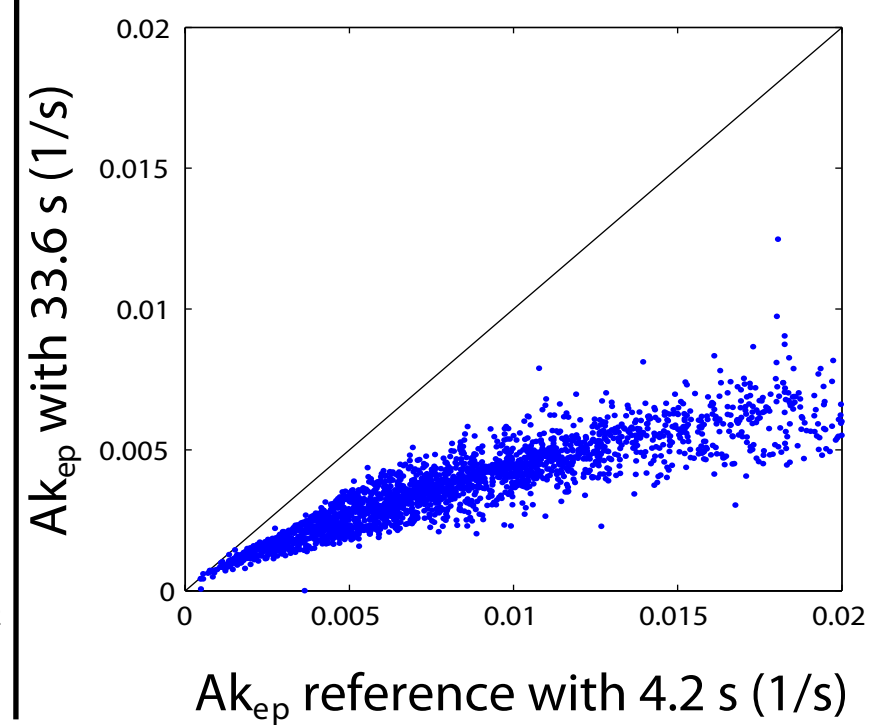

Supplement: NIHMS502511-supplement-2.pdf [file NIHMS502511-supplement-2.pdf]
